# Supplementary material
Source: Springer Nature journal article supplement (https://www.springermedizin.de/resource/supplementary/12916_2012_793_MOESM1_ESM.pdf/9598312)
Supplement: MOESM1 [file 9598312]

**Reports retrieved in databases**  
*n* = 3,763

Excluded reports (*n* = 3,690)\*  
Not fulfilling main inclusion criteria  
(*n* = 2,644)  
Not considering causes for differences in  
drug response based on ancestry  
(*n* = 982)  
Double entry of a paper within one database  
(*n* = 63)  
Double publication  
(*n* = 1)

**Eligible reports<sup>†</sup>**  
*n* = 73

Not included (*n* = 18)  
Not providing separate numerical data on  
different drug types  
(*n* = 2)  
No subgroup analyses based on ancestry  
(*n* = 5)  
Double publication  
(*n* = 1)  
Duplicate eligible reports  
(*n* = 10)

**Included**  
*n* = 55

Non-electronic search  
contact with authors, hand searching  
(*n* = 17)

**Total included reports**  
*n* = 72
